# Supplementary material for: The Evolution of Robust Development and Homeostasis in Artificial Organisms
Source: PubMed Central journal article supplement (PMC2274883; doi:10.1371/journal.pcbi.1000030), 2008-03-28
Supplement: pcbi.1000030.s003.pdf [file pcbi.1000030.s003.pdf]

Table I

Comparison of the ruleset of organism #18 at generations 3 and 30

| Gene # | Generation 3 - genome                                                    | Generation 30 - genome                                                   |
|--------|--------------------------------------------------------------------------|--------------------------------------------------------------------------|
| 1      | if (East in interval [9 - 9]) then = Move to (0,1,0)                     | if (South in interval [3 - 3]) then = Don't move in dir (0,0,1)          |
| 2      | if (CellType in interval [2 - 2]) then = Don't clone in dir (0,1,0)      | if (CellType in interval [2 - 2]) then = Don't clone in dir (0,1,0)      |
| 3      | if (East in interval [4 - 4]) then = Clone in dir (0,0,-1)               | if (West in interval [3 - 3]) then = Don't die                           |
| 4      | if (Division in interval [278 - 487]) then = Don't die                   | if (Division in interval [278 - 487]) then = Don't die                   |
| 5      | if (Timesteps in interval [134 - 345]) then = Clone in dir (1,0,0)       | if (Timesteps in interval [134 - 345]) then = Clone in dir (1,0,0)       |
| 6      | if (Division in interval [49 - 484]) then = Move to (0,0,1)              | if (Division in interval [49 - 484]) then = Move to (0,0,1)              |
| 7      | if (Division in interval [373 - 402]) then = Don't clone in dir (1,0,0)  | if (South in interval [4 - 4]) then = Clone in dir (-1,0,0)              |
| 8      | if (North in interval [3 - 3]) then = Don't clone in dir (1,0,0)         | if (Up in interval [8 - 8]) then = Don't move in dir (0,1,0)             |
| 9      | if (Timesteps in interval [220 - 405]) then = Don't clone in dir (1,0,0) | if (East in interval [2 - 2]) then = Clone in dir (0,0,-1)               |
| 10     | if (Timesteps in interval [346 - 458]) then = Don't move in dir (0,1,0)  | if (North in interval [3 - 3]) then = Clone in dir (0,-1,0)              |
| 11     | if (Down in interval [5 - 5]) then = Move to (1,0,0)                     | if (CellType in interval [1 - 1]) then = Don't move in dir (-1,0,0)      |
| 12     | if (East in interval [1 - 1]) then = Move to (-1,0,0)                    | if (Timesteps in interval [96 - 382]) then = Clone in dir (0,0,-1)       |
| 13     | if (CellType in interval [2 - 2]) then = Clone in dir (-1,0,0)           | if (South in interval [2 - 2]) then = Die                                |
| 14     | if (East in interval [0 - 0]) then = Don't clone in dir (0,0,-1)         | if (West in interval [2 - 2]) then = Move to (0,0,1)                     |
| 15     | if (Down in interval [8 - 8]) then = Don't die                           | if (Down in interval [8 - 8]) then = Don't die                           |
| 16     | if (Up in interval [6 - 6]) then = Die                                   | if (Up in interval [6 - 6]) then = Die                                   |
| 17     | if (Down in interval [5 - 5]) then = Move to (0,-1,0)                    | if (Down in interval [5 - 5]) then = Move to (0,-1,0)                    |
| 18     | if (North in interval [0 - 0]) then = Don't die                          | if (North in interval [0 - 0]) then = Don't die                          |
| 19     | if (Up in interval [0 - 0]) then = Don't clone in dir (0,0,-1)           | if (Up in interval [0 - 0]) then = Don't clone in dir (0,0,-1)           |
| 20     | if (West in interval [5 - 5]) then = Die                                 | if (East in interval [4 - 4]) then = Don't move in dir (0,-1,0)          |
| 21     | if (CellType in interval [1 - 1]) then = Move to (1,0,0)                 | if (CellType in interval [1 - 1]) then = Move to (1,0,0)                 |
| 22     | if (North in interval [1 - 1]) then = Clone in dir (-1,0,0)              | if (West in interval [8 - 8]) then = Move to (0,-1,0)                    |
| 23     | if (CellType in interval [0 - 0]) then = Don't move in dir (0,-1,0)      | if (CellType in interval [0 - 0]) then = Don't move in dir (0,-1,0)      |
| 24     | if (North in interval [7 - 7]) then = Don't move in dir (0,1,0)          | if (North in interval [7 - 7]) then = Don't move in dir (0,1,0)          |
| 25     | if (South in interval [9 - 9]) then = Don't die                          | if (South in interval [9 - 9]) then = Don't die                          |
| 26     | if (West in interval [5 - 5]) then = Don't die                           | if (West in interval [5 - 5]) then = Don't die                           |
| 27     | if (Division in interval [242 - 493]) then = Die                         | if (Division in interval [242 - 493]) then = Die                         |
| 28     | if (Down in interval [1 - 1]) then = Clone in dir (0,-1,0)               | if (Down in interval [1 - 1]) then = Clone in dir (0,-1,0)               |
| 29     | if (Up in interval [0 - 0]) then = Clone in dir (0,0,1)                  | if (Up in interval [0 - 0]) then = Clone in dir (0,0,1)                  |
| 30     | if (Timesteps in interval [328 - 421]) then = Clone in dir (0,0,-1)      | if (Timesteps in interval [328 - 421]) then = Clone in dir (0,0,-1)      |
| 31     | if (North in interval [3 - 3]) then = Die                                | if (North in interval [3 - 3]) then = Die                                |
| 32     | if (CellType in interval [1 - 1]) then = Die                             | if (CellType in interval [1 - 1]) then = Die                             |
| 33     | if (Division in interval [454 - 484]) then = Don't die                   | if (Division in interval [454 - 484]) then = Don't die                   |
| 34     | if (North in interval [1 - 1]) then = Clone in dir (0,0,-1)              | if (North in interval [1 - 1]) then = Clone in dir (0,0,-1)              |
| 35     | if (North in interval [6 - 6]) then = Clone in dir (0,0,1)               | if (North in interval [6 - 6]) then = Clone in dir (0,0,1)               |
| 36     | if (North in interval [0 - 0]) then = Clone in dir (0,0,1)               | if (North in interval [0 - 0]) then = Clone in dir (0,0,1)               |
| 37     | if (Down in interval [4 - 4]) then = Move to (0,0,1)                     | if (Down in interval [4 - 4]) then = Move to (0,0,1)                     |
| 38     | if (Up in interval [5 - 5]) then = Clone in dir (0,0,1)                  | if (Up in interval [5 - 5]) then = Clone in dir (0,0,1)                  |
| 39     | if (West in interval [5 - 5]) then = Move to (0,1,0)                     | if (West in interval [5 - 5]) then = Move to (0,1,0)                     |
| 40     | if (CellType in interval [2 - 2]) then = Don't die                       | if (CellType in interval [2 - 2]) then = Don't die                       |
| 41     | if (Timesteps in interval [397 - 483]) then = Die                        | if (Up in interval [0 - 0]) then = Die                                   |
| 42     | if (CellType in interval [0 - 0]) then = Don't clone in dir (1,0,0)      | if (CellType in interval [0 - 0]) then = Don't clone in dir (1,0,0)      |
| 43     | if (Down in interval [3 - 3]) then = Die                                 | if (Down in interval [3 - 3]) then = Die                                 |
| 44     | if (Division in interval [249 - 302]) then = Move to (0,-1,0)            | if (Division in interval [249 - 302]) then = Move to (0,-1,0)            |
| 45     | if (Division in interval [247 - 391]) then = Die                         | if (Division in interval [247 - 391]) then = Die                         |
| 46     | if (West in interval [0 - 0]) then = Clone in dir (0,-1,0)               | if (West in interval [0 - 0]) then = Clone in dir (0,-1,0)               |
| 47     | if (Down in interval [6 - 6]) then = Don't move in dir (1,0,0)           | if (Timesteps in interval [193 - 200]) then = Don't clone in dir (0,0,1) |
| 48     | if (Up in interval [8 - 8]) then = Move to (0,-1,0)                      | if (Up in interval [8 - 8]) then = Move to (0,-1,0)                      |
| 49     | if (East in interval [7 - 7]) then = Don't move in dir (0,-1,0)          | if (East in interval [7 - 7]) then = Don't move in dir (0,-1,0)          |
| 50     | if (Division in interval [59 - 481]) then = Move to (0,0,1)              | if (Division in interval [59 - 481]) then = Move to (0,0,1)              |
| 51     | if (CellType in interval [0 - 0]) then = Move to (1,0,0)                 | if (CellType in interval [0 - 0]) then = Move to (1,0,0)                 |
| 52     | if (South in interval [1 - 1]) then = Don't clone in dir (0,0,1)         | if (South in interval [1 - 1]) then = Don't clone in dir (0,0,1)         |
| 53     | if (Timesteps in interval [210 - 238]) then = Clone in dir (0,1,0)       | if (Timesteps in interval [210 - 238]) then = Clone in dir (0,1,0)       |
| 54     | if (Division in interval [420 - 481]) then = Clone in dir (0,0,-1)       | if (Division in interval [420 - 481]) then = Clone in dir (0,0,-1)       |
| 55     | if (Up in interval [7 - 7]) then = Clone in dir (0,0,-1)                 | if (Up in interval [7 - 7]) then = Clone in dir (0,0,-1)                 |
| 56     | if (Down in interval [6 - 6]) then = Don't die                           | if (Down in interval [6 - 6]) then = Don't die                           |
| 57     | if (Up in interval [9 - 9]) then = Clone in dir (1,0,0)                  | if (East in interval [7 - 7]) then = Move to (0,-1,0)                    |
| 58     | if (Up in interval [4 - 4]) then = Don't move in dir (1,0,0)             | if (CellType in interval [0 - 0]) then = Move to (0,0,-1)                |
| 59     | if (Timesteps in interval [142 - 334]) then = Don't clone in dir (0,1,0) | if (West in interval [6 - 6]) then = Don't clone in dir (0,-1,0)         |
| 60     | if (West in interval [4 - 4]) then = Die                                 | if (Up in interval [7 - 7]) then = Don't clone in dir (0,0,1)            |
| 61     | if (Division in interval [359 - 378]) then = Don't die                   | if (Down in interval [4 - 4]) then = Die                                 |
| 62     | if (Division in interval [215 - 422]) then = Move to (0,0,-1)            | if (Division in interval [215 - 422]) then = Move to (0,0,-1)            |
| 63     | if (West in interval [3 - 3]) then = Don't clone in dir (0,1,0)          | if (West in interval [3 - 3]) then = Don't clone in dir (0,1,0)          |
| 64     | if (Division in interval [34 - 270]) then = Die                          | if (Division in interval [34 - 270]) then = Die                          |
| 65     | if (Timesteps in interval [2 - 116]) then = Clone in dir (0,1,0)         | if (Up in interval [8 - 8]) then = Move to (0,0,1)                       |
| 66     | if (South in interval [2 - 2]) then = Clone in dir (1,0,0)               | if (South in interval [2 - 2]) then = Clone in dir (1,0,0)               |
| 67     | if (West in interval [7 - 7]) then = Clone in dir (-1,0,0)               | if (West in interval [7 - 7]) then = Clone in dir (-1,0,0)               |
| 68     | if (West in interval [0 - 0]) then = Don't die                           | if (West in interval [0 - 0]) then = Don't die                           |
| 69     | if (Division in interval [41 - 309]) then = Die                          | if (Division in interval [41 - 309]) then = Die                          |
| 70     | if (North in interval [7 - 7]) then = Move to (0,1,0)                    | if (North in interval [7 - 7]) then = Move to (0,1,0)                    |
| 71     | if (CellType in interval [0 - 0]) then = Don't clone in dir (1,0,0)      | if (Up in interval [7 - 7]) then = Don't move in dir (0,0,-1)            |
| 72     | if (West in interval [5 - 5]) then = Clone in dir (0,-1,0)               | if (West in interval [5 - 5]) then = Clone in dir (0,-1,0)               |
| 73     | if (West in interval [5 - 5]) then = Clone in dir (0,0,-1)               | if (South in interval [7 - 7]) then = Don't clone in dir (1,0,0)         |
| 74     | if (Timesteps in interval [104 - 179]) then = Don't move in dir (1,0,0)  | if (Timesteps in interval [104 - 179]) then = Don't move in dir (1,0,0)  |
| 75     | if (South in interval [5 - 5]) then = Don't die                          | if (East in interval [2 - 2]) then = Don't clone in dir (0,1,0)          |
| 76     | if (West in interval [4 - 4]) then = Clone in dir (1,0,0)                | if (West in interval [4 - 4]) then = Clone in dir (1,0,0)                |
| 77     | if (Up in interval [6 - 6]) then = Don't move in dir (1,0,0)             | if (Timesteps in interval [31 - 256]) then = Clone in dir (0,0,1)        |
| 78     | if (East in interval [6 - 6]) then = Don't die                           | if (East in interval [6 - 6]) then = Don't die                           |
| 79     | if (CellType in interval [1 - 1]) then = Don't move in dir (0,1,0)       | if (CellType in interval [1 - 1]) then = Don't move in dir (0,1,0)       |
| 80     | if (Division in interval [23 - 491]) then = Die                          | if (Division in interval [23 - 491]) then = Die                          |
| 81     | if (East in interval [7 - 7]) then = Clone in dir (0,0,1)                | if (Timesteps in interval [356 - 498]) then = Don't die                  |
| 82     | if (East in interval [5 - 5]) then = Move to (0,1,0)                     | if (East in interval [5 - 5]) then = Move to (0,1,0)                     |
| 83     | if (Timesteps in interval [23 - 40]) then = Don't clone in dir (1,0,0)   | if (Timesteps in interval [303 - 426]) then = Move to (0,0,-1)           |
| 84     | if (North in interval [6 - 6]) then = Don't clone in dir (1,0,0)         | if (North in interval [6 - 6]) then = Don't clone in dir (1,0,0)         |
| 85     | if (Division in interval [338 - 410]) then = Move to (0,1,0)             | if (Division in interval [338 - 410]) then = Move to (0,1,0)             |
| 86     | if (Up in interval [0 - 0]) then = Die                                   | if (Up in interval [0 - 0]) then = Die                                   |
| 87     | if (Down in interval [0 - 0]) then = Don't die                           | if (Down in interval [0 - 0]) then = Don't die                           |
| 88     | if (Timesteps in interval [171 - 488]) then = Clone in dir (0,1,0)       | if (Timesteps in interval [171 - 488]) then = Clone in dir (0,1,0)       |
| 89     | if (CellType in interval [1 - 1]) then = Clone in dir (0,0,1)            | if (Division in interval [31 - 164]) then = Clone in dir (1,0,0)         |
| 90     | if (North in interval [4 - 4]) then = Move to (1,0,0)                    | if (North in interval [4 - 4]) then = Move to (1,0,0)                    |
| 91     | if (East in interval [1 - 1]) then = Die                                 | if (East in interval [6 - 6]) then = Clone in dir (0,-1,0)               |
| 92     | if (Timesteps in interval [151 - 286]) then = Die                        | if (Timesteps in interval [151 - 286]) then = Die                        |
| 93     | if (North in interval [5 - 5]) then = Clone in dir (0,0,-1)              | if (North in interval [5 - 5]) then = Clone in dir (0,0,-1)              |
| 94     | if (South in interval [6 - 6]) then = Don't move in dir (0,-1,0)         | if (CellType in interval [0 - 0]) then = Move to (0,1,0)                 |
| 95     | if (Timesteps in interval [152 - 235]) then = Don't die                  | if (Timesteps in interval [152 - 235]) then = Don't die                  |
| 96     | if (Down in interval [4 - 4]) then = Don't clone in dir (0,-1,0)         | if (Timesteps in interval [201 - 327]) then = Move to (0,1,0)            |
| 97     | if (South in interval [3 - 3]) then = Don't move in dir (0,-1,0)         | if (South in interval [3 - 3]) then = Don't move in dir (0,-1,0)         |
| 98     | if (Up in interval [4 - 4]) then = Don't move in dir (0,0,-1)            | if (Up in interval [4 - 4]) then = Don't move in dir (0,0,-1)            |
| 99     | if (Division in interval [28 - 300]) then = Die                          | if (Division in interval [28 - 300]) then = Die                          |
| 100    | if (Down in interval [3 - 3]) then = Move to (1,0,0)                     | if (North in interval [2 - 2]) then = Don't clone in dir (0,0,1)         |
